# Supplementary material for: Identifying the effective behaviour change techniques in nutrition and physical activity interventions for the treatment of overweight/obesity in post-treatment breast cancer survivors: a systematic review
Source: Springer Nature journal article supplement (doi:10.1007/s10552-023-01707-w), 2023-05-06
Supplement: MOESM1 [file 25327448]

## Database Search Strategies

### Pubmed/Medline

|             |                                                                                                                                                     |
|-------------|-----------------------------------------------------------------------------------------------------------------------------------------------------|
| #1          | breast neoplasm[MeSH Terms]                                                                                                                         |
| #2          | (breast cancer) OR (breast cancer survivors)                                                                                                        |
| #3          | (#1) OR (#2)                                                                                                                                        |
| #4          | ((((lifestyle intervention) OR (behavioral intervention)) OR (behavioural intervention)) OR (theory-based intervention)) OR (theoretical framework) |
| #5          | (#3) AND (#4)                                                                                                                                       |
| #6          | (overweight) OR (obesity)                                                                                                                           |
| #7          | (#5) AND (#6)                                                                                                                                       |
| #8          | ((((weight loss) OR (weight-loss)) OR (weight change)) OR (weight management)) OR (BMI reduction)                                                   |
| #9          | (#7) AND (#8)                                                                                                                                       |
| Results     | 281                                                                                                                                                 |
| Last search | 01/08/2022                                                                                                                                          |

### Central/Cochrane Library

|     |                                                       |
|-----|-------------------------------------------------------|
| #1  | MeSH descriptor: [Breast Neoplasms] explode all trees |
| #2  | (breast cancer): ti,ab,kw                             |
| #3  | breast cancer survivors                               |
| #4  | #1 or #2 or #3                                        |
| #5  | (lifestyle intervention): ti,ab,kw                    |
| #6  | (behavioral intervention): ti,ab,kw                   |
| #7  | (behavioural intervention): ti,ab,kw                  |
| #8  | (theory-based intervention): ti,ab,kw                 |
| #9  | (theoretical framework): ti,ab,kw                     |
| #10 | #5 or #6 or #7 or #8 or #9                            |
| #11 | #4 and #10                                            |
| #12 | (overweight): ti,ab,kw                                |
| #13 | (obesity): ti,ab,kw                                   |
| #14 | #12 and #13                                           |
| #15 | #11 and #14                                           |
| #16 | (weight loss): ti,ab,kw                               |

|             |                                 |
|-------------|---------------------------------|
| #17         | (weight-loss): ti,ab,kw         |
| #18         | (weight change): ti,ab,kw       |
| #19         | (weight management): ti,ab,kw   |
| #20         | (BMI reduction): ti,ab,kw       |
| #21         | #16 or #17 or #18 or #19 or #20 |
| #22         | #15 and #21                     |
| Results     | 142                             |
| Last search | 01/08/2022                      |

### Scopus Database

( TITLE-ABS-KEY ( breast AND cancer ) OR TITLE-ABS-KEY ( breast AND cancer AND survivors ) AND TITLE-ABS-KEY ( lifestyle AND intervention ) OR TITLE-ABS-KEY ( behavioral AND intervention ) OR TITLE-ABS-KEY ( behavioural AND intervention ) OR TITLE-ABS-KEY ( theory-based AND intervention ) OR TITLE-ABS-KEY ( theoretical AND framework ) AND TITLE-ABS-KEY ( overweight ) OR TITLE-ABS-KEY ( obesity ) AND TITLE-ABS-KEY ( weight AND loss ) OR TITLE-ABS-KEY ( weight-loss ) OR TITLE-ABS-KEY ( weight AND change ) OR TITLE-ABS-KEY ( weight AND management ) OR TITLE-ABS-KEY ( bmi AND reduction ) )

Results: 220

Last search: 01/08/2022

### TripDatabase

#### Simple Search

(breast cancer OR breast cancer survivors) AND (lifestyle intervention OR behavioral intervention OR behavioural intervention OR theory-based intervention OR theoretical framework) AND (overweight OR obesity) AND (weight loss OR weight-loss OR weight change OR weight management OR BMI reduction)

Last search: 01/08/2022

Total Results 1226

Systematic Reviews 89

Evidence Based Synopses 106

Guidelines 400

Regulatory Guidance 30

Key primary research 4

clinical Q&A 2

Controlled Trials 37

Primary research 124

Ongoing Clinical Trials 177

Ongoing systematic reviews 1

patients information leaflets 5

blogs 19

eTextbooks 277

### 62 publications excluded with a reason

| Publications   | Reasons                         |
|----------------|---------------------------------|
| Allcock, 2021  | Non theory-based                |
| Anderson, 2016 | Other results of the LEAN study |

| <b>Publications</b>     | <b>Reasons</b>                                                   |
|-------------------------|------------------------------------------------------------------|
| Appel, 2011             | Protocol study (POWER trial)                                     |
| Arikawa, 2018           | Non theory-based                                                 |
| Beford, 2014            | Protocol study                                                   |
| Beford, 2016            | Randomization after 6 months / wrong study design                |
| Campbell, 2012          | Non theory-based                                                 |
| Christifano, 2016       | Non theory-based                                                 |
| Delahanty, 2021         | Protocol study (BWEL Study)                                      |
| Demark-Wahnefried, 2015 | Other results of the Energy Trial (examining quality of life)    |
| Di Meglio, 2022         | Protocol study (MEDEA study design)                              |
| Dittus, 2015            | Non theory-based                                                 |
| Dittus, 2018            | Non theory-based                                                 |
| Djuric, 2010            | Randomization after 6 months / wrong study design                |
| Fazzino, 2016           | The aim of the intervention was not weight loss                  |
| Ferrucci, 2017          | Other results of the LEAN study                                  |
| Gao, 2019               | The aim of the intervention was not weight loss                  |
| Ghavami, 2015           | Non theory-based                                                 |
| Gnagnarella, 2016       | Protocol study (In Forma Study)                                  |
| Goodwin, 2019           | Other results of the LISA trial                                  |
| Goodwin, 2020           | Other results of the LISA trial                                  |
| Greenlee, 2013          | Non theory-based                                                 |
| Greenlee, 2022          | Not overweight/obese                                             |
| Harris, 2013            | Non RCT                                                          |
| Hauner, 2020            | Protocol study (SUCCESS C Study)                                 |
| Hooshmand, 2021         | Non theory-based                                                 |
| Janni, 2019             | Initial results / not the intervention results (SUCCESS C Study) |
| Jen, 2004               | Other results of the trial of Djuric et al, 2002                 |
| Kim, 2011               | Not overweight/obese                                             |
| Kwarteng, 2022          | Other results of the Moving Forward study                        |
| Lisevick, 2021          | Other results of the LEAN study                                  |
| Long Parma, 2022        | The aim of the intervention was not weight loss                  |

| <b>Publications</b> | <b>Reasons</b>                                                  |
|---------------------|-----------------------------------------------------------------|
| Lozano-Lozano, 2020 | Non theory-based                                                |
| Lyons, 2016         | Non theory-based                                                |
| Male, 2022          | Single arm study / not control group                            |
| Nguyen, 2021        | Other results of the LEAN study                                 |
| Parekh, 2018        | Not overweight/obese                                            |
| Patterson, 2016     | Pharmacological RCT (Reach for Health Trial)                    |
| Puklin, 2021        | Other results of the LEAN study                                 |
| Quintiliani, 2016   | Single arm study / not control group                            |
| Ramirez, 2017       | Protocol study                                                  |
| Ream, 2022          | The aim of the intervention was not weight loss                 |
| Reeves, 2012        | Other results of the Living Well Trial                          |
| Reeves, 2016        | Study Design/protocol study                                     |
| Rock, 2013          | Study Design/protocol study                                     |
| Sanft, 2014         | Other results of the LEAN study                                 |
| Sanft, 2016         | Other results of the LEAN study                                 |
| Sanft, 2018         | Other results of the LEAN study                                 |
| Saxton, 2014        | Non theory-based                                                |
| Scott, 2013         | Non theory-based                                                |
| Sedgo, 2016         | Other results of the Energy Trial (examining comorbidities)     |
| Sheng, 2022         | Other results of the POWER-remote trial                         |
| Stolley, 2009       | Other results of the Moving Forward study (not an intervention) |
| Stolley, 2015       | Study Design/protocol study                                     |
| Sturgeon, 2017      | Other results of the Wiser Trial                                |
| Sturgeon, 2018      | Other results of the Wiser Trial                                |
| Sweeney, 2020       | Non theory-based                                                |
| Travier, 2014       | Non theory-based                                                |
| Vitolins, 2014      | Single arm study / not control group                            |
| Vona-Devis, 2015    | Non theory-based                                                |
| Winkels, 2017       | Describes the protocol                                          |
| Zuniga, 2019        | The aim of the intervention was not weight loss                 |

## References of the excluded studies

1. Allicock, M., Kendzor, D., Sedory, A., Gabriel, K. P., Swartz, M. D., Thomas, P., Yudkin, J. S., & Rivers, A. (2021). A Pilot and Feasibility Mobile Health Intervention to Support Healthy Behaviors in African American Breast Cancer Survivors. *J Racial Ethn Health Disparities*, 8(1), 157-165. <https://doi.org/10.1007/s40615-020-00767-x>
2. Anderson, C., Harrigan, M., George, S. M., Ferrucci, L. M., Sanft, T., Irwin, M. L., & Cartmel, B. (2016). Changes in diet quality in a randomized weight loss trial in breast cancer survivors: The lifestyle, exercise, and nutrition (LEAN) study [Article]. *npj Breast Cancer*, 2(1), Article 16026. <https://doi.org/10.1038/npjbcancer.2016.26>.
3. Appel L, Clark J, Yeh H, Wang N, Coughlin J, Daumit G, et al. Comparative effectiveness of weight-loss interventions in clinical practice. *N Engl J Med* 2011; 365:1959–68. <https://doi.org/10.1056/nejmoa1108660>.
4. Arikawa, A. Y., Kaufman, B. C., Raatz, S. K., & Kurzer, M. S. (2018). Effects of a parallel-arm randomized controlled weight loss pilot study on biological and psychosocial parameters of overweight and obese breast cancer survivors. *Pilot Feasibility Stud*, 4, 17. <https://doi.org/10.1186/s40814-017-0160-9>
5. Befort, C., Klemp, J., Fabian, C., Perri, M., Sullivan, D., Schmitz, K., Diaz, F., & Shireman, T. (2014). Protocol and recruitment results from a randomized controlled trial comparing group phone-based versus newsletter interventions for weight loss maintenance among rural breast cancer survivors [Article]. *Contemporary Clinical Trials*, 37(2), 261-271. <https://doi.org/10.1016/j.cct.2014.01.010>
6. Befort, C. A., Klemp, J. R., Sullivan, D. K., Shireman, T., Diaz, F. J., Schmitz, K., Perri, M. G., & Fabian, C. (2016). Weight loss maintenance strategies among rural breast cancer survivors: the rural women connecting for better health trial [Journal Article; Randomized Controlled Trial]. *Obesity (Silver Spring, Md.)*, 24(10), 2070-2077. <https://doi.org/10.1002/oby.21625>
7. Campbell, K. L., Van Patten, C. L., Neil, S. E., Kirkham, A. A., Gotay, C. C., Gelmon, K. A., & McKenzie, D. C. (2012). Feasibility of a lifestyle intervention on body weight and serum biomarkers in breast cancer survivors with overweight and obesity. *J Acad Nutr Diet*, 112(4), 559-567. <https://doi.org/10.1016/j.jada.2011.10.022>
8. Christifano, D. N., Fazzino, T. L., Sullivan, D. K., & Befort, C. A. (2016). Diet Quality of Breast Cancer Survivors after a Six-Month Weight Management Intervention: Improvements and Association with Weight Loss [Article]. *Nutrition and Cancer*, 68(8), 1301-1308. <https://doi.org/10.1080/01635581.2016.1224368>
9. Delahanty, L. M., Wadden, T. A., Goodwin, P. J., Alfano, C. M., Thomson, C. A., Irwin, M. L., Neuhaus, M. L., Crane, T. E., Frank, E., Spears, P. A., & et al. (2022). The Breast Cancer Weight Loss trial (Alliance A011401): a description and evidence for the lifestyle intervention [Journal: Review]. *Obesity (Silver Spring, Md.)*, 30(1), 28-38. <https://doi.org/10.1002/oby.23287>
10. Demark-Wahnefried, W., Colditz, G. A., Rock, C. L., Sedjo, R. L., Liu, J., Wolin, K. Y., Krontiras, H., Byers, T., Pakiz, B., Parker, B. A., Naughton, M., Elias, A., & Ganz, P. A. (2015). Quality of life outcomes from the Exercise

- and Nutrition Enhance Recovery and Good Health for You (ENERGY)-randomized weight loss trial among breast cancer survivors. *Breast Cancer Res Treat*, 154(2), 329-337. <https://doi.org/10.1007/s10549-015-3627-5>
11. Di Meglio, A., Martin, E., Crane, T. E., Charles, C., Barbier, A., Raynard, B., Mangin, A., Tredan, O., Bouleuc, C., Cottu, P. H., & et al. (2022). A phase III randomized trial of weight loss to reduce cancer-related fatigue among overweight and obese breast cancer patients: MEDEA Study design [Clinical Trial, Phase III; Journal Article; Multicenter Study; Randomized Controlled Trial]. *Trials*, 23(1), 193. <https://doi.org/10.1186/s13063-022-06090-6>
  12. Dittus, L.K. (2015). Effectiveness of an Internet Delivered Behavioral Weight Loss Intervention Provided to Breast Cancer Survivors. *Advances in Obesity, Weight Management & Control*. 2(3).
  13. Dittus, K. L., Harvey, J. R., Bunn, J. Y., Kokinda, N. D., Wilson, K. M., Priest, J., & Pratley, R. E. (2018). Impact of a behaviorally-based weight loss intervention on parameters of insulin resistance in breast cancer survivors. *BMC Cancer*, 18(1), 351. <https://doi.org/10.1186/s12885-018-4272-2>
  14. Djuric, Z., Ellsworth, J., Rapai, M., Weldon, A., Kim, J., & Sen, A. (2010). A diet and exercise intervention in women being treated for breast cancer. *Cancer research*. <https://www.cochranelibrary.com/central/doi/10.1002/central/CN-01984892/full>
  15. Fazzino, T. L., Fleming, K., & Befort, C. (2016). Alcohol Intake Among Breast Cancer Survivors: Change in Alcohol Use During a Weight Management Intervention. *JMIR Cancer*, 2(2), e15. <https://doi.org/10.2196/cancer.6295>
  16. Ferrucci, L. M., Cartmel, B., Harrigan, M., Sanft, T., Playdon, M., Jia, W., Yu, H., Johnson, C. H., Pusztai, L., Chagpar, A. B., & et al. (2017). Metabolomics and body mass index among breast cancer survivors in The Lifestyle, Exercise, and Nutrition (LEAN) Study [Journal: Conference Abstract]. *Cancer research*, 77(13). <https://doi.org/10.1158/1538-7445.AM2017-5321>
  17. Gao, H., Cohen, E. N., Yang, P., Austin, T. A., Haddad, R., Wu, Q., Basen-Engquist, K. M., Ochoa, J. M., Arun, B. K., Perkins, G. H., & et al. (2019). Circulating tumor cell subset analysis to assess lifestyle interventions for breast cancer patients after neoadjuvant chemotherapy [Journal: Conference Abstract]. *Cancer research*, 79(4). <https://doi.org/10.1158/1538-7445.SABCS18-P3-01-15>
  18. Ghavami, H., & Akyolcu, N. (2015). Effects of lifestyle interventions on body mass index in breast cancer patients [Journal: Conference Abstract]. *Value in health*, 18(7), A433. <https://www.cochranelibrary.com/central/doi/10.1002/central/CN-01164136/full>
  19. Gnagnarella, P., Dragà, D., Baggi, F., Simoncini, M. C., Sabbatini, A., Mazzocco, K., Bassi, F. D., Pravettoni, G., & Maisonneuve, P. (2016). Promoting weight loss through diet and exercise in overweight or obese breast cancer survivors (InForma): study protocol for a randomized controlled trial. *Trials*, 17, 363. <https://doi.org/10.1186/s13063-016-1487-x>
  20. Goodwin, P. J., Segal, R., Vallis, M., Ligibel, J. A., Pond, G. R., Robidoux, A., Findlay, B. P., Gralow, J. R., Mukherjee, S. D., Levine, M. N., & et al. (2019). Lifestyle intervention study (LISA) in early breast cancer (BC):

- an RCT of the effects of a telephone-based weight loss intervention (with educational materials) vs educational materials alone on disease-free survival (DFS) [Journal: Conference Abstract]. *Cancer research*, 79(4). <https://doi.org/10.1158/15387445.SABCS18-PD6-04>
21. Goodwin, P. J., Segal, R. J., Vallis, M., Ligibel, J. A., Pond, G. R., Robidoux, A., Findlay, B., Gralow, J. R., Mukherjee, S. D., Levine, M., & et al. (2020). The LISA randomized trial of a weight loss intervention in postmenopausal breast cancer [Journal: Article]. *npj Breast Cancer*, 6(1). <https://doi.org/10.1038/s41523-020-0149-z>
  22. Greenlee, H.A., Crew, K.D., Mata, J.M., McKinley, P.S., Rundle, A.G., Zhang, W., Liao, Y., Tsai, W.Y., Hershman, D.L. (2013). A pilot randomized controlled trial of a commercial diet and exercise weight loss program in minority breast cancer survivors. *Obesity (Silver Spring)*, 21(1):65-76. doi: 10.1002/oby.20245. PMID: 23505170; PMCID: PMC4705911.
  23. Greenlee, H., Santiago-Torres, M., Koch, P., Tsai, W. Y., Gray, H. L., Brickman, A. M., Gaffney, A. O., Eddy, M., Thomson, C. A., Crane, T. E., & et al. (2022). A randomized, controlled, 2x2 factorial trial of a diet and physical activity intervention among Latina breast cancer survivors: ¡mi Vida Saludable! study [Journal: Conference Abstract]. *Cancer research*, 82(4 SUPPL). <https://doi.org/10.1158/1538-7445.SABCS21-P1-10-07>
  24. Harris, M., Swift, D., Myers, V., Earnest, C., Johannsen, N., Champagne, C., Parker, B., Levy, E., Cash, K., & Church, T. (2013). Cancer Survival Through Lifestyle Change (CASTLE): a Pilot Study of Weight Loss [Article]. *International Journal of Behavioral Medicine*, 20(3), 403-412. <https://doi.org/10.1007/s12529-012-9234-5>
  25. Hauner, D., Rack, B., Friedl, T., Hepp, P., Janni, W, Hauner, H. (2020). Rationale and description of a lifestyle intervention programme to achieve moderate weight loss in women with non-metastatic breast cancer: the lifestyle intervention part of the SUCCESS C Study. *BMJ Nutr Prev Health*, 3(2):213-219. doi: 10.1136/bmjnp-2020-000119. PMID: 33521531; PMCID: PMC7841841.
  26. Hooshmand Moghadam, B., Golestani, F., Bagheri, R., Cheraghloo, N., Eskandari, M., Wong, A., Nordvall, M., Suzuki, K., Pournemati, P. (2021). The Effects of High-Intensity Interval Training vs. Moderate-Intensity Continuous Training on Inflammatory Markers, Body Composition, and Physical Fitness in Overweight/Obese Survivors of Breast Cancer: A Randomized Controlled Clinical Trial. *Cancers*, 13, 4386. <https://doi.org/10.3390/cancers13174386>
  27. Janni, W., Rack, B. K., Friedl, T. W., Muller, V., Lorenz, R., Rezai, M., Tesch, H., Heinrich, G., Andergassen, U., Harbeck, N., & et al. (2019). Lifestyle intervention and effect on disease-free survival in early breast cancer Pts: interim analysis from the randomized SUCCESS C study [Journal: Conference Abstract]. *Cancer research*, 79(4). <https://doi.org/10.1158/15387445.SABCS18-GS5-03>
  28. Jen, K.L., Djuric, Z., DiLaura, N.M., Buison, A., Redd, J.N., Maranci, V., Hryniuk, W.M. (2004). Improvement of metabolism among obese breast cancer survivors in differing weight loss regimens. *Obes Res*, 12(2):306-12. doi: 10.1038/oby.2004.38. PMID: 14981223.

29. Kim, S.H., Shin, M.S., Lee, H.S., Lee, E.S., Ro, J.S., Kang, H.S., Kim, S.W., Lee, W.H., Kim, H.S., Kim, C.J., Kim, J., Yun, Y.H. (2011). Randomized pilot test of a simultaneous stage-matched exercise and diet intervention for breast cancer survivors. *Oncol Nurs Forum*, 38(2):E97-106. doi: 10.1188/11.ONF.E97-E106. PMID: 21356647.
30. Kwarteng, J. L., Matthews, L., Banerjee, A., Sharp, L. K., Gerber, B. S., & Stolley, M. R. (2022). The association of stressful life events on weight loss efforts among African American breast cancer survivors. *J Cancer Surviv*, 16(3), 604-613. <https://doi.org/10.1007/s11764-021-01054-2>
31. Lisevick, A., Cartmel, B., Harrigan, M., Li, F., Sanft, T., Fogarasi, M., Irwin, M. L., & Ferrucci, L. M. (2021). Effect of the Lifestyle, Exercise, and Nutrition (LEAN) Study on Long-Term Weight Loss Maintenance in Women with Breast Cancer [Journal Article; Randomized Controlled Trial]. *Nutrients*, 13(9). <https://doi.org/10.3390/nu13093265>
32. Long Parma, D. A., Reynolds, G. L., Muñoz, E., & Ramirez, A. G. (2022). Effect of an anti-inflammatory dietary intervention on quality of life among breast cancer survivors. *Support Care Cancer*, 30(7), 5903-5910. <https://doi.org/10.1007/s00520-022-07023-4>
33. Lozano-Lozano, M., Martín-Martín, L., Galiano-Castillo, N., Fernández-Lao, C., Cantarero-Villanueva, I., López-Barajas, I. B., & Arroyo-Morales, M. (2020). Mobile health and supervised rehabilitation versus mobile health alone in breast cancer survivors: randomized controlled trial [Journal Article; Randomized Controlled Trial]. *Annals of physical and rehabilitation medicine*, 63(4), 316-324. <https://doi.org/10.1016/j.rehab.2019.07.007>
34. Lyons, E. J., Baranowski, T., Basen-Engquist, K. M., Lewis, Z. H., Swartz, M. C., Jennings, K., & Volpi, E. (2016). Testing the effects of narrative and play on physical activity among breast cancer survivors using mobile apps: study protocol for a randomized controlled trial [Journal Article; Randomized Controlled Trial; Research Support, N.I.H., Extramural; Research Support, Non-U.S. Gov't; Research Support, U.S. Gov't, Non-P.H.S.; Research Support, U.S. Gov't, P.H.S.]. *BMC Cancer*, 16, 202. <https://doi.org/10.1186/s12885-016-2244-y>
35. Male, D., Fergus, K., & Yufe, S. (2022). 'Weighing' Losses and Gains: Evaluation of the Healthy Lifestyle Modification After Breast Cancer Pilot Program [Article]. *Frontiers in Psychology*, 13, Article 814671. <https://doi.org/10.3389/fpsyg.2022.814671>
36. Nguyen, T., Irwin, M. L., Dewan, A. T., Cartmel, B., Harrigan, M., Ferrucci, L. M., Sanft, T., Li, F., Lu, L., & Salinas, Y. D. (2021). Examining the effect of obesity-associated gene variants on breast cancer survivors in a randomized weight loss intervention [Journal Article; Randomized Controlled Trial]. *Breast cancer research and treatment*, 187(2), 487-497. <https://doi.org/10.1007/s10549-021-06151-5>
37. Parekh, N., Jiang, J., Buchan, M., Meyers, M., Gibbs, H., Krebs, P. (2018). Nutrition Literacy among Cancer Survivors: Feasibility Results from the Healthy Eating and Living Against Breast Cancer (HEAL-BCa) Study: a Pilot Randomized Controlled Trial. *J Cancer Educ*, 33(6):1239-1249. doi: 10.1007/s13187-017-1238-z. PMID: 28624990.



38. Patterson, R. E., Marinac, C. R., Natarajan, L., Hartman, S. J., Cadmus-Bertram, L., Flatt, S. W., Li, H., Parker, B., Oratowski-Coleman, J., Villaseñor, A., Godbole, S., & Kerr, J. (2016). Recruitment strategies, design, and participant characteristics in a trial of weight-loss and metformin in breast cancer survivors. *Contemp Clin Trials*, 47, 64-71. <https://doi.org/10.1016/j.cct.2015.12.009>
39. Puklin, L., Cartmel, B., Harrigan, M., Lu, L., Li, F. Y., Sanft, T., & Irwin, M. L. (2021). Randomized trial of weight loss on circulating ghrelin levels among breast cancer survivors. *npj Breast Cancer*, 7(1), 49. <https://doi.org/10.1038/s41523-021-00260-6>
40. Quintiliani, L. M., Mann, D. M., Puputti, M., Quinn, E., & Bowen, D. J. (2016). Pilot and Feasibility Test of a Mobile Health-Supported Behavioral Counseling Intervention for Weight Management Among Breast Cancer Survivors. *JMIR Cancer*, 2(1). <https://doi.org/10.2196/cancer.5305>
41. Ramirez, A.G., Parma, D.L., Muñoz, E., Mendoza, K.D., Harb, C., Holden, A.E.C., Wargovich, M. (2017). An anti-inflammatory dietary intervention to reduce breast cancer recurrence risk: Study design and baseline data. *Contemp Clin Trials*, 57:1-7. doi: 10.1016/j.cct.2017.03.009. Epub 2017 Mar 22. PMID: 28342988; PMCID: PMC6110085.
42. Ream, M., Saez-Clarke, E., Taub, C., Diaz, A., Frasca, D., Blomberg, B. B., & Antoni, M. H. (2022). Brief Post-Surgical Stress Management Reduces Pro-Inflammatory Cytokines in Overweight and Obese Breast Cancer Patients Undergoing Primary Treatment. *Front Biosci (Landmark Ed)*, 27(5), 148. <https://doi.org/10.31083/j.fbl2705148>
43. Reeves, M., Winkler, E., McCarthy, N., Lawler, S., Eakin, E., & Healy, G. (2012). Living well after breast cancer: changes in objectively-measured physical activity in a weight loss trial [Journal: Conference Abstract]. *Journal of science and medicine in sport*, 15, S334. <https://doi.org/10.1016/j.jsams.2012.11.811>.
44. Reeves MM, Terranova CO, Erickson J, Job JR, Brookes DS, McCarthy N, et al. Living Well after Breast Cancer randomized controlled trial protocol: evaluating a telephone-delivered weight loss intervention versus usual care in women following treatment for breast cancer. *BMC Cancer*. 2016;16:830. <https://doi.org/10.1186/s12885-016-2858-0>.
45. Rock CL, Byers TE, Colditz GA, Demark-Wahnefried W, Ganz PA, Wolin KY, et al. Reducing breast cancer recurrence with weight loss, a vanguard trial: the Exercise and Nutrition to Enhance Recovery and Good Health for You (ENERGY) Trial. *Contemp Clin Trials*. 2013;34(2):282-95. <https://doi.org/10.1016/j.cct.2012.12.003>.
46. Sanft, T. B., Harrigan, M., Cartmel, B., Playdon, M., Zhou, Y., Loftfield, E., & Irwin, M. (2014). Effect of weight history on ability to lose weight after a 6-month randomized controlled weight loss trial in overweight breast cancer survivors: the lifestyle, exercise, and nutrition (LEAN) study [Journal: Conference Abstract]. *Journal of Clinical Oncology*, 32(15 SUPPL. 1). <https://www.cochranelibrary.com/central/doi/10.1002/central/CN-01055970/full>
47. Sanft, T., Lu, L., Harrigan, M., Cartmel, B., Zhou, Y., Chagpar, A., Pusztai, L., & Irwin, M. (2016). Randomized controlled trial of weight loss vs. usual care on telomere length in women with breast cancer: the lifestyle, exercise

and nutrition (LEAN) study [Journal: Conference Abstract]. *Cancer research*, 76(4). <https://doi.org/10.1158/1538-7445.SABCS15-P3-08-01>

48. Sanft, T., Usiskin, I., Harrigan, M., Cartmel, B., Lu, L., Li, F. Y., Zhou, Y., Chagpar, A., Ferrucci, L. M., Puzstai, L., & et al. (2018). Randomized controlled trial of weight loss versus usual care on telomere length in women with breast cancer: the lifestyle, exercise, and nutrition (LEAN) study [Journal Article; Randomized Controlled Trial]. *Breast cancer research and treatment*, 172(1), 105-112. <https://doi.org/10.1007/s10549-018-4895-7>
49. Saxton, J. M., Scott, E. J., Daley, A. J., Woodroffe, M., Mutrie, N., Crank, H., Powers, H. J., & Coleman, R. E. (2014). Effects of an exercise and hypocaloric healthy eating intervention on indices of psychological health status, hypothalamic-pituitary-adrenal axis regulation and immune function after early-stage breast cancer: a randomised controlled trial [Journal Article; Randomized Controlled Trial; Research Support, Non-U.S. Gov't]. *Breast cancer research*, 16(2), R39. <https://doi.org/10.1186/bcr3643>
50. Scott, E., Daley, A. J., Doll, H., Woodroffe, N., Coleman, R. E., Mutrie, N., Crank, H., Powers, H. J., & Saxton, J. M. (2013). Effects of an exercise and hypocaloric healthy eating program on biomarkers associated with long-term prognosis after early-stage breast cancer: a randomized controlled trial. *Cancer Causes Control*, 24(1), 181-191. <https://doi.org/10.1007/s10552-012-0104-x>
51. Sedjo, R., Flatt, S., Byers, T., Colditz, G., Demark-Wahnefried, W., Ganz, P., Wolin, K., Elias, A., Krontiras, H., Liu, J., Naughton, M., Pakiz, B., Parker, B., Wyatt, H., & Rock, C. (2016). Impact of a behavioral weight loss intervention on comorbidities in overweight and obese breast cancer survivors [Article]. *Supportive Care in Cancer*, 24(8), 3285-3293. <https://doi.org/10.1007/s00520-016-3141-2>
52. Sheng, J. Y., Santa-Maria, C. A., Blackford, A. L., Lim, D., Carpenter, A., Smith, K. L., Cohen, G. I., Coughlin, J., Appel, L. J., Stearns, V., & Snyder, C. (2022). The impact of weight loss on physical function and symptoms in overweight or obese breast cancer survivors: results from POWER-remote. *J Cancer Surviv*, 16(3), 542-551. <https://doi.org/10.1007/s11764-021-01049-z>
53. Stolley, M. R., Sharp, L. K., Oh, A., & Schiffer, L. (2009). A weight loss intervention for African American breast cancer survivors, 2006 [Article]. *Preventing Chronic Disease*, 6(1), Article A22. <https://www.scopus.com/inward/record.uri?eid=2-s2.0-59149099227&partnerID=40&md5=386e64e905bb555cae8987825cccc6be>.
54. Stolley MR, Sharp LK, Fantuzzi G, Arroyo C, Sheean P, Schiffer L, et al. Study design and protocol for moving forward: a weight loss intervention trial for African-American breast cancer survivors. *BMC Cancer*. 2015;15:1018. <https://doi.org/10.1186/s12885-015-2004-4>.
55. Sturgeon, K. M., Dean, L. T., Heroux, M., Kane, J., Bauer, T., Palmer, E., Long, J., Lynch, S., Jacobs, L., Sarwer, D. B., Leonard, M. B., & Schmitz, K. (2017). Commercially available lifestyle modification program: randomized controlled trial addressing heart and bone health in BRCA1/2+ breast cancer survivors after risk-reducing salpingo-oophorectomy. *J Cancer Surviv*, 11(2), 246-255. <https://doi.org/10.1007/s11764-016-0582-z>

56. Sturgeon, K., Foo, W., Heroux, M., & Schmitz, K. (2018). Change in Inflammatory Biomarkers and Adipose Tissue in BRCA1/2(+) Breast Cancer Survivors Following a Yearlong Lifestyle Modification Program [Article]. *Cancer Prevention Research*, 11(9), 545-550. <https://doi.org/10.1158/1940-6207.CAPR-18-0098>
57. Sweeney, F. C., Demark-Wahnefried, W., Courneya, K. S., Tripathy, D., Sami, N., Lee, K., Buchanan, T. A., Spicer, D., Bernstein, L., Mortimer, J. E., & et al. (2020). Ethnocentric differences in sarcopenicobesity and body composition in response to an aerobic and resistance exercise intervention for breast cancersurvivors [Journal: Conference Abstract]. *Cancer epidemiology biomarkers and prevention*, 29(6 SUPPL 1). <https://doi.org/10.1158/1538-7755.DIS18-C123>
58. Travier, N., Fonseca-Nunes, A., Javierre, C., Guillamo, E., Arribas, L., Peiró, I., Buckland, G., Moreno, F., Urruticoechea, A., Oviedo, G. R., Roca, A., Hurtós, L., Ortega, V., Muñoz, M., Garrigós, L., Cirauqui, B., Del Barco, S., Arcusa, A., Seguí, M. A., Borràs, J. M., Gonzalez, C. A., & Agudo, A. (2014). Effect of a diet and physical activity intervention on body weight and nutritional patterns in overweight and obese breast cancer survivors [Article]. *Medical Oncology*, 31(1), Article 783. <https://doi.org/10.1007/s12032-013-0783-5>
59. Vitolins, M. Z., Milliron, B. J., Hopkins, J. O., Fulmer, A., Lawrence, J., Melin, S., & Case, D. (2014). Weight Loss Intervention in Survivors of ER/PR-negative Breast Cancer. *Clin Med Insights Womens Health*, 7, 17-24. <https://doi.org/10.4137/cmwh.S13955>
60. Vona-Davis, L., Abraham, J., Bonner, D., Gilleland, D., Hobbs, G., Kurian, S., Yanosik, M. A., & Swisher, A. (2015). Effect of a 12-week supervised physical activity and healthy eating program on body weight, functional capacity and serum biomarkers in survivors of triple-negative breast cancer: a randomized, controlled trial [Journal: Conference Abstract]. *Cancer research*, 75(9). <https://doi.org/10.1158/1538-7445.SABCS14-P1-09-12>.
61. Winkels RM, Sturgeon KM, Kallan MJ, Dean LT, Zhang Z, Evangelisti M, et al. The Women in Steady Exercise Research (WISER) Survivor trial: the innovative transdisciplinary design of a randomized controlled trial of exercise and weight-loss interventions among breast cancer survivors with lymphedema. *Contemp Clin Trials*. 2017;61:63-72. <https://doi.org/10.1016/j.cct.2017.07.017>.
62. Zuniga, K.E., Parma, D.L., Muñoz, E., Spaniol, M., Wargovich, M., Ramirez, A.G. (2019). Dietary intervention among breast cancer survivors increased adherence to a Mediterranean-style, anti-inflammatory dietary pattern: the Rx for Better Breast Health Randomized Controlled Trial. *Breast Cancer Res Treat*, 173(1):145-154. doi: 10.1007/s10549-018-4982-9. Epub 2018 Sep 26. PMID: 30259284; PMCID: PMC6387648.
