# Supplementary material for: Identifying the effective behaviour change techniques in nutrition and physical activity interventions for the treatment of overweight/obesity in post-treatment breast cancer survivors: a systematic review
Source: Springer Nature journal article supplement (doi:10.1007/s10552-023-01707-w), 2023-05-06
Supplement: MOESM3 [file 25327448]

## Analysis of the Rob-2 scoring.

| Domains   |                 | Rock, 2015<br>[40] | Demark-<br>Wahne-<br>fried, 2014<br>[41] | Mefferd,<br>2006 [42] | Djuric,<br>2002 [43] | Sheppard,<br>2016 [44] | Harrigan,<br>2016 [45] | Stolley,<br>2017 [46] | Santa-<br>Maria,<br>2020 [47] | Reeves,<br>2017 [48] | Schmitz,<br>2019 [49] | Goodwin,<br>2014 [50] |
|-----------|-----------------|--------------------|------------------------------------------|-----------------------|----------------------|------------------------|------------------------|-----------------------|-------------------------------|----------------------|-----------------------|-----------------------|
| <b>D1</b> | 1.1             | Y                  | PY                                       | PY                    | PY                   | NI                     | Y                      | Y                     | Y                             | Y                    | Y                     | Y                     |
|           | 1.2             | PY                 | Y                                        | NI                    | PY                   | NI                     | Y                      | Y                     | PY                            | Y                    | Y                     | Y                     |
|           | 1.3             | N                  | N                                        | N                     | PN                   | PN                     | N                      | PN                    | N                             | N                    | N                     | PN                    |
|           | <b>D1 Total</b> | <b>LOW</b>         | <b>LOW</b>                               | <b>SC</b>             | <b>LOW</b>           | <b>SC</b>              | <b>LOW</b>             | <b>LOW</b>            | <b>LOW</b>                    | <b>LOW</b>           | <b>LOW</b>            | <b>LOW</b>            |
| <b>D2</b> | 2.1             | PY                 | N                                        | PY                    | PY                   | PY                     | PY                     | PY                    | Y                             | PY                   | PY                    | PY                    |
|           | 2.2             | PY                 | Y                                        | PY                    | PY                   | PY                     | PY                     | PY                    | PY                            | PY                   | PY                    | PY                    |
|           | 2.3             | NI                 | NI                                       | NI                    | NI                   | NI                     | NI                     | NI                    | NI                            | NI                   | NI                    | NI                    |
|           | 2.6             | PN                 | PY                                       | PN                    | NI                   | PY                     | Y                      | PY                    | Y                             | PY                   | Y                     | Y                     |
|           | 2.7             | PN                 |                                          | PY                    | PY                   |                        |                        |                       |                               |                      |                       |                       |
|           | <b>D2 Total</b> | <b>SC</b>          | <b>SC</b>                                | <b>HIGH</b>           | <b>HIGH</b>          | <b>SC</b>              | <b>SC</b>              | <b>SC</b>             | <b>SC</b>                     | <b>SC</b>            | <b>SC</b>             | <b>SC</b>             |
| <b>D3</b> | 3.1             | PY                 | Y                                        | N                     | PN                   | N                      | PY                     | PN                    | PY                            | PY                   | PY                    | Y                     |
|           | 3.2             |                    |                                          | PN                    | PN                   | PY                     |                        | PN                    |                               |                      |                       |                       |
|           | 3.3             |                    |                                          | PN                    | PN                   |                        |                        | PN                    |                               |                      |                       |                       |
|           | <b>D3 Total</b> | <b>LOW</b>         | <b>LOW</b>                               | <b>LOW</b>            | <b>LOW</b>           | <b>LOW</b>             | <b>LOW</b>             | <b>LOW</b>            | <b>LOW</b>                    | <b>LOW</b>           | <b>LOW</b>            | <b>LOW</b>            |
| <b>D4</b> | 4.1             | N                  | N                                        | PN                    | N                    | NI                     | N                      | N                     | PN                            | N                    | PN                    | N                     |
|           | 4.2             | N                  | N                                        | N                     | N                    | N                      | N                      | N                     | N                             | N                    | N                     | N                     |
|           | 4.3             | PN                 | PY                                       | PY                    | NI                   | PY                     | PY                     | PY                    | N                             | N                    | N                     | PY                    |

| Domains        |                 | Rock, 2015 [40] | Demark-Wahnefried, 2014 [41] | Mefferd, 2006 [42] | Djuric, 2002 [43] | Sheppard, 2016 [44] | Harrigan, 2016 [45] | Stolley, 2017 [46] | Santa-Maria, 2020 [47] | Reeves, 2017 [48] | Schmitz, 2019 [49] | Goodwin, 2014 [50] |
|----------------|-----------------|-----------------|------------------------------|--------------------|-------------------|---------------------|---------------------|--------------------|------------------------|-------------------|--------------------|--------------------|
|                | 4.4             |                 | PN                           | PN                 | PN                | PN                  | PN                  | PN                 |                        |                   |                    | PN                 |
|                | <b>D4 Total</b> | <b>LOW</b>      | <b>LOW</b>                   | <b>LOW</b>         | <b>LOW</b>        | <b>LOW</b>          | <b>LOW</b>          | <b>LOW</b>         | <b>LOW</b>             | <b>LOW</b>        | <b>LOW</b>         | <b>LOW</b>         |
| <b>D5</b>      | 5.1             | Y               | Y                            | NI                 | NI                | PY                  | PY                  | Y                  | PY                     | Y                 | Y                  | PY                 |
|                | 5.2             | N               | N                            | N                  | N                 | N                   | N                   | N                  | N                      | N                 | N                  | N                  |
|                | 5.3             | N               | PN                           | NI                 | NI                | NI                  | N                   | PN                 | PN                     | PN                | PN                 | PN                 |
|                | <b>D5 Total</b> | <b>LOW</b>      | <b>LOW</b>                   | <b>SC</b>          | <b>SC</b>         | <b>SC</b>           | <b>LOW</b>          | <b>LOW</b>         | <b>LOW</b>             | <b>LOW</b>        | <b>LOW</b>         | <b>LOW</b>         |
| <b>Overall</b> |                 | <b>SC</b>       | <b>SC</b>                    | <b>HIGH</b>        | <b>HIGH</b>       | <b>HIGH</b>         | <b>SC</b>           | <b>SC</b>          | <b>SC</b>              | <b>SC</b>         | <b>SC</b>          | <b>SC</b>          |

Y = yes, PY = probably yes, N = no, PN = probably no, NI = no information, SC = some concerns.

## Crosstabs

### Symmetric Measures

|                      |       | Value | Asymptotic Standard Error <sup>a</sup> | Approximate T <sup>b</sup> | Approximate Significance |
|----------------------|-------|-------|----------------------------------------|----------------------------|--------------------------|
| Measure of Agreement | Kappa | .694  | .030                                   | 24.893                     | <.001                    |
| N of Valid Cases     |       | 308   |                                        |                            |                          |

a. Not assuming the null hypothesis.

b. Using the asymptotic standard error assuming the null hypothesis.
